# Supplementary material for: Mouse Antibody of IgM Class is Prone to Non-Enzymatic Cleavage between CH1 and CH2 Domains
Source: PubMed Central journal article supplement (PMC5764968; doi:10.1038/s41598-017-19003-4), 2018-01-11
Supplement: 41598_2017_19003_MOESM1_ESM.pdf [file 41598_2017_19003_MOESM1_ESM.pdf]

## **Mouse Antibody of IgM Class Is Prone to Non-Enzymatic Cleavage between CH1 and CH2 Domains**

### **Supplementary Figures**

Tomasz Klaus<sup>1,2</sup>, Krystyna Stalińska<sup>2</sup>, Dominik Czaplicki<sup>2</sup>, Paweł Mak<sup>3</sup>, Bożena Skupien-Rabian<sup>1,4</sup>, Sylwia Kedracka-Krok<sup>4</sup>, Karolina Wiatrowska<sup>2</sup>, Monika Bzowska<sup>2</sup>, Monika Machula<sup>2</sup>, Joanna Bereta<sup>2\*</sup>

<sup>1</sup>Malopolska Centre of Biotechnology, Jagiellonian University in Kraków, Gronostajowa 7A, 30-387 Kraków, Poland; <sup>2</sup>Department of Cell Biochemistry, <sup>3</sup>Department of Analytical Biochemistry, <sup>4</sup>Department of Physical Biochemistry, Faculty of Biochemistry, Biophysics and Biotechnology, Jagiellonian University in Kraków, Gronostajowa 7, 30-387 Kraków, Poland;

\* To whom correspondence should be addressed: Joanna Bereta, Department of Cell Biochemistry, Faculty of Biochemistry, Biophysics and Biotechnology, Jagiellonian University in Kraków, Gronostajowa 7, 30-387 Kraków, Poland; telephone: +48 12 664 63 56; Fax: +48 12 664 69 02; e-mail: [joanna.bereta@uj.edu.pl](mailto:joanna.bereta@uj.edu.pl)

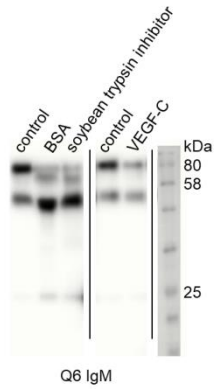

Supplementary Figure S1 – **IgM cleavage induced by various proteins.** IgMs were incubated at 42 °C for 72 h with a hundredfold excess of the indicated proteins. Then, the samples were analyzed using western blotting with anti-mouse IgM $\kappa$  antibody. The image combines data from one blot. Representative result of two independent experiments is shown.

Figure 2c

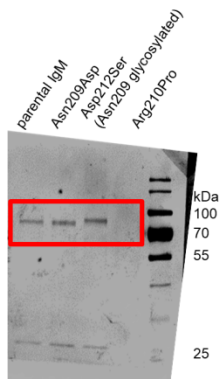

Figure 3a

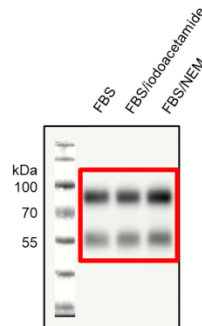

Figure 4c

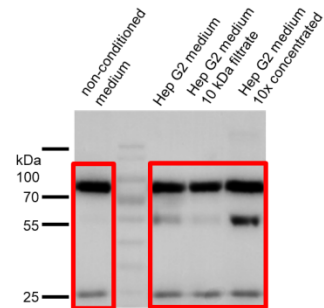

Supplementary Figure S2 – **Full-length versions of blots presented in the main manuscript.** Red frames indicate fragments presented in the Figures 2c, 3a and 4c in the main text.

Figure 2c

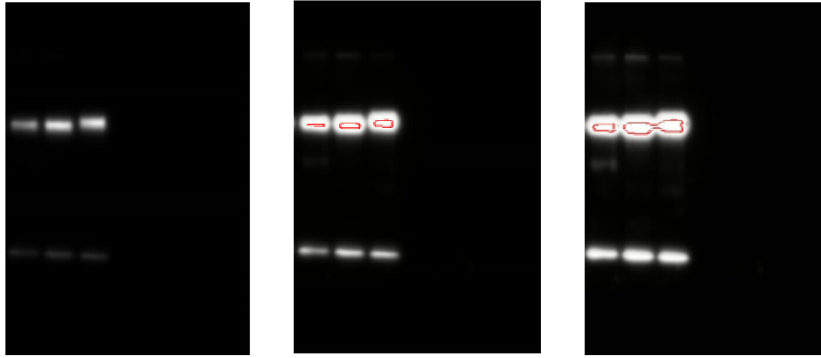

Figure 2d

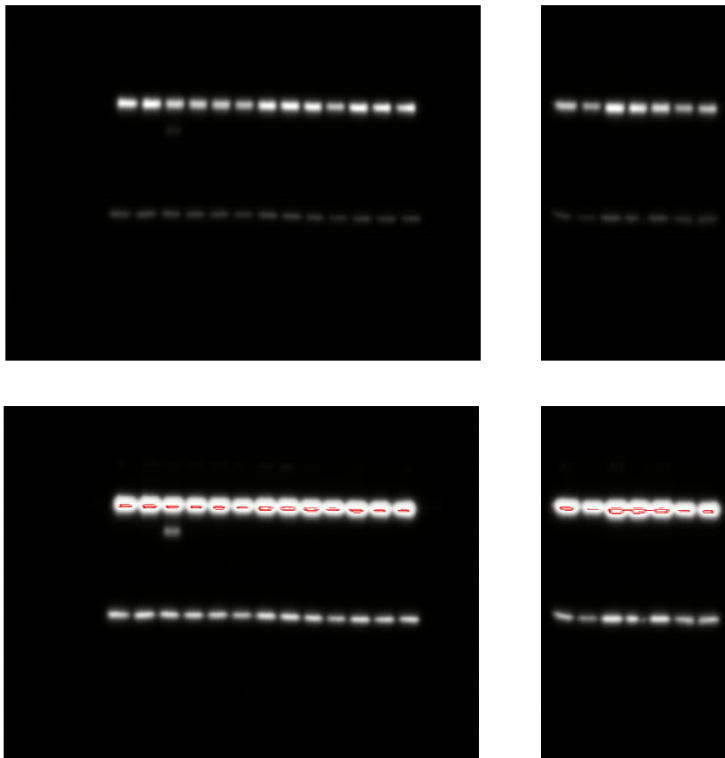

Supplementary Figure 3 – **Serial exposures of overexposed blots presented in Figures 2c and 2d in the manuscript.** Overexposed areas are marked in red.
